# Supplementary material for: Evaluation and Optimization of Quality Based on the Physicochemical Characteristics and Metabolites Changes of Qingpi during Storage
Source: MDPI journal article supplement (doi:10.3390/foods12030463), 2023-01-19
Supplement: s1 [file s1]

**Table S1.** Recovery tests of hesperidin, nobiletin, and tangeretin in Qingpi sample (Qingpi 1).

| Compounds  | Sample<br>(g) | Original<br>(mg) | Addition<br>(mg) | Detected<br>(mg) | Recovery<br>(%) | Average<br>recovery<br>(%) | RSD<br>(%) |
|------------|---------------|------------------|------------------|------------------|-----------------|----------------------------|------------|
| Hesperidin | 0.2516        | 2.966            | 3.01             | 5.839            | 95.44           | 97.43                      | 1.75       |
|            | 0.2521        | 2.973            | 3.06             | 5.943            | 97.07           |                            |            |
|            | 0.2510        | 2.960            | 3.03             | 5.860            | 95.69           |                            |            |
|            | 0.2510        | 2.960            | 3.10             | 5.994            | 97.88           |                            |            |
|            | 0.2517        | 2.967            | 3.13             | 6.057            | 98.70           |                            |            |
|            | 0.2512        | 2.962            | 3.11             | 6.065            | 99.78           |                            |            |
| Nobiletin  | 0.2516        | 1.427            | 1.42             | 2.855            | 100.56          | 99.82                      | 2.81       |
|            | 0.2521        | 1.430            | 1.40             | 2.861            | 102.23          |                            |            |
|            | 0.2510        | 1.424            | 1.44             | 2.828            | 97.52           |                            |            |
|            | 0.2510        | 1.408            | 1.49             | 2.8290           | 95.35           |                            |            |
|            | 0.2517        | 1.396            | 1.45             | 2.861            | 100.97          |                            |            |
|            | 0.2512        | 1.379            | 1.38             | 2.790            | 102.31          |                            |            |
| Tangeretin | 0.2516        | 1.000            | 1.01             | 2.045            | 103.44          | 100.16                     | 2.59       |
|            | 0.2521        | 1.002            | 1.10             | 2.096            | 99.40           |                            |            |
|            | 0.2510        | 0.9981           | 1.11             | 2.091            | 98.47           |                            |            |
|            | 0.2510        | 0.9872           | 1.07             | 2.042            | 98.63           |                            |            |
|            | 0.2517        | 0.9789           | 1.03             | 2.044            | 103.42          |                            |            |
|            | 0.2512        | 0.9664           | 0.98             | 1.923            | 97.61           |                            |            |

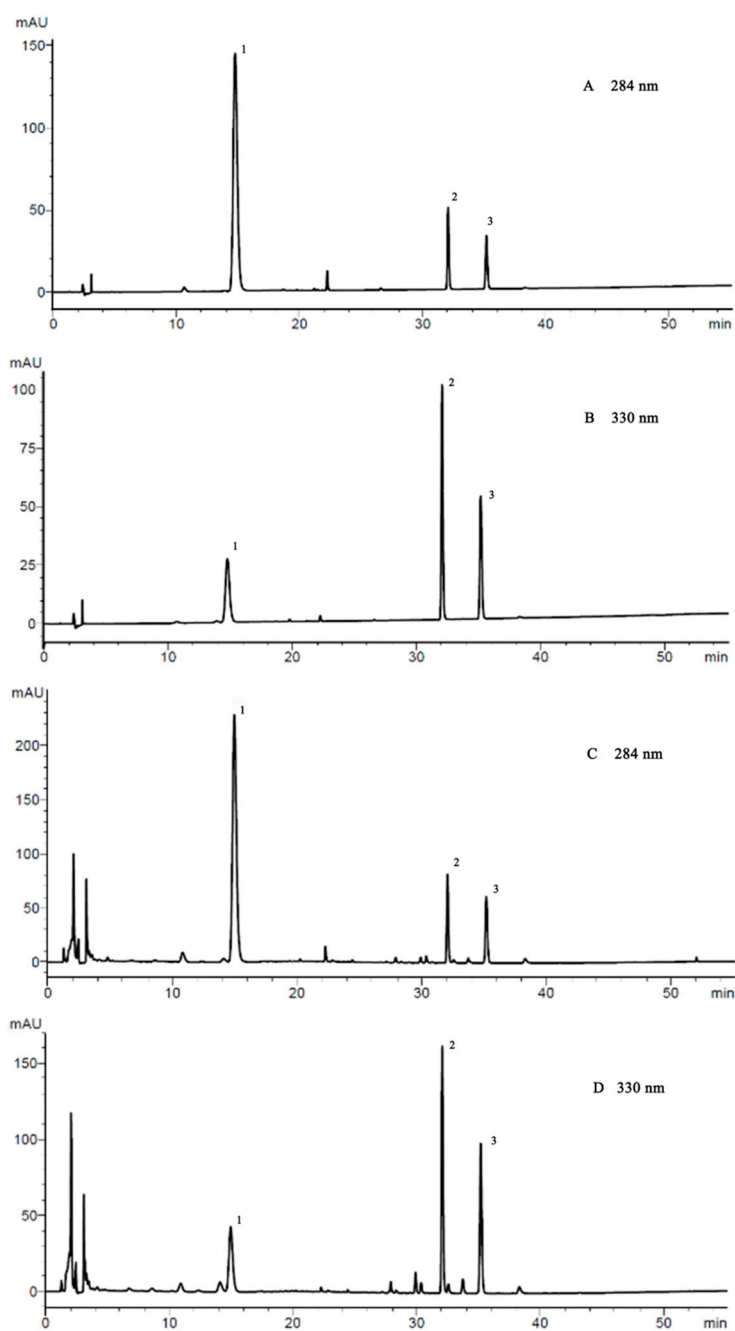

Figure S1. Typical HPLC chromatograms of mixed standard solution (A and B) and samples (Qingpi 1) (C and D).

Numbers 1, 2, and 3 denote hesperidin, nobiletin, and tangeretin, respectively.

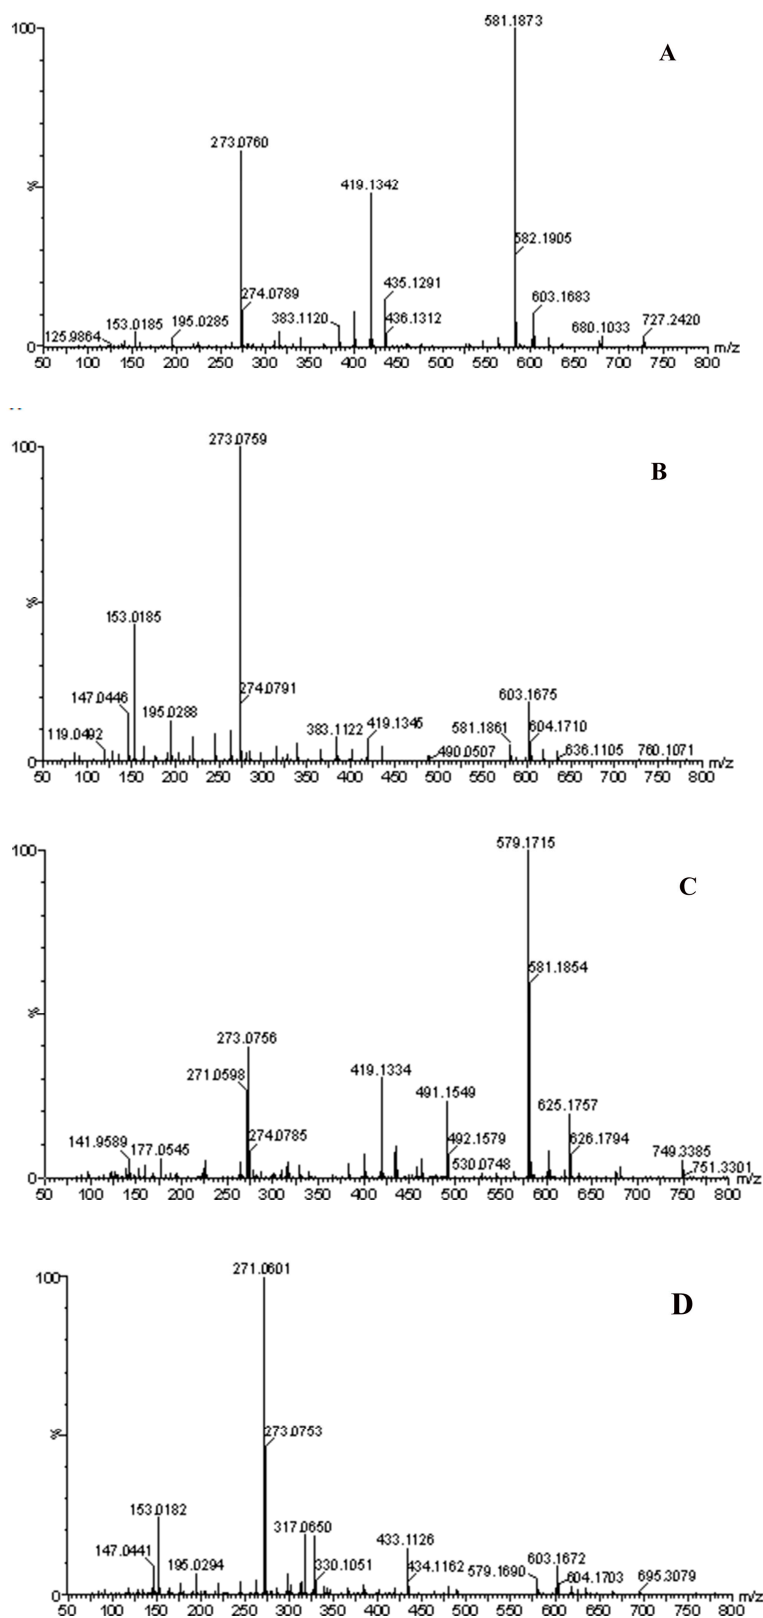

Figure S2. Mass spectra of reference substance (narirutin) and sample. Primary (A) and secondary (B) mass spectra of narirutin; Primary (C) and secondary (D) mass spectra of peak at 4.62 min retention time of the sample.
